# Supplementary material for: Gender differences in coronary artery diameters and survival results after off-pump coronary artery bypass (OPCAB) procedures
Source: PubMed Central journal article supplement — J Thorac Dis. 2021 May;13(5):2867–73. doi: 10.21037/jtd-20-3356 (PMC8182499; doi:10.21037/jtd-20-3356), 2021-05
Supplement: jtd-13-05-2867-dss.pdf [file jtd-13-05-2867-dss.pdf]

## Data Sharing Statement

|                     |                                                                                                                                                    |                                                                                                                                      |
|---------------------|----------------------------------------------------------------------------------------------------------------------------------------------------|--------------------------------------------------------------------------------------------------------------------------------------|
| <b>Article Info</b> | http://dx.doi.org/10.21037/jtd-20-3356.                                                                                                            |                                                                                                                                      |
| <b>Item</b>         | <b>Question</b>                                                                                                                                    | <b>Authors' Response<br/>(place "-" if not applicable)</b>                                                                           |
| 1                   | Would you like to share data collected for your study to others?                                                                                   | Yes                                                                                                                                  |
| 2                   | If not, would you like to share the reason for your decision?                                                                                      | -                                                                                                                                    |
| 3                   | What data in particular will be shared?                                                                                                            | Intraoperative data collected with restrictions regarding personal details of the patients.                                          |
| 4                   | Any other documents will be share? Such as study protocol, statistical analysis plan, informed consent form, clinical study report, analytic code. | Statistical analysis plan, informed consent form, and clinical study report will also be shared if requested.                        |
| 5                   | When will data availability begin?                                                                                                                 | From publication date.                                                                                                               |
| 6                   | When will data availability end?                                                                                                                   | One year within the publication date, since the survival date may be updated over time.                                              |
| 7                   | To whom will you share the data?                                                                                                                   | Cardiac surgeons who are involved in any research regarding intraoperative measurements of shunts diameters during OPCAB procedures. |
| 8                   | For what type of analysis or purpose?                                                                                                              | For analysis the purpose and safety of OPCAB procedures regarding gender differences.                                                |
| 9                   | How or where can the data/documents be obtained?                                                                                                   | Email can be sent to the address below to obtain the shared data:<br>tk.urbanowicz@gmail.com                                         |
| 10                  | Any other restrictions?                                                                                                                            | We may balance the potential benefits and risks for each request and then provide the data that could be shared.                     |
